# Supplementary material for: Whole-genome analysis of noncoding genetic variations identifies multiscale regulatory element perturbations associated with Hirschsprung disease
Source: HighWire-hosted journal article supplement (doi:10.1101/gr.264473.120), 2020-09-18
Supplement: Supplemental_Table_S1.xlsx [file Supplemental_Table_S1.xlsx]

## Sheet: README
Supplement Table S1. Lists of loosely associated enhancers, promoters and genes identified from the application of MAVEL to the S-HSCR data.
Each list contains the locations of the elements in hg38, gene symbols (if applicable), MARVEL association P-values, corresponding FDR Q-values, the TF motifs selected by the procedure, and the AUROC score. For each selected motif, its coefficient in the model is also provided, where a positive value corresponds to an increase of disease risk with a gain of the motif match score, and a negative v…

## Sheet: Enhancers
Location in hg38	P-value	FDR Q-value	Selected motifs		AUROC
			TF names	Model coefficients of motifs
chr10:43086011-43087012	7.34249e-08	0.00553727	DUXA,EGR1,EGR2,EGR2,FEZF1,PRRX1,TFAP4,ZNF136	-0.001,0.251,0.251,0.251,-0.021,0.001,-0.001,0.251	0.779825
chr10:43084182-43085183	7.34249e-08	0.00553727	ATF2,IRF4,IRF8,MAFF,MIXL1,OLIG2,TEAD4,ZBTB18,ZNF317	0.306,0.187,0.187,-0.304,-0.446,0.306,0.374,0.749,0.31	0.783184
chr10:43064374-43065375	1.4685e-07	0.00738302	VDR	-0.907	0.777095
chr10:43105184-43106185	2.20275e-07	0.0083059	MBD2,SP2,WT1,ZNF281,ZNF554,ZNF563	-0.081,0.075,-0.014,-0.002,0.757,-0.033	0.758996
chr10:43137096-43138097	2.937e-07	0.00885962	FOXJ3,RARA,SMAD2,SMAD4,SP1,ZNF282,ZNF436	-0.1,0.026,-0.012,-0.012,0.025,-0.019,-0.644	0.741821
chr10:43137390-43138391	3.67125e-07	0.00922878	IRF5,NEUROG2,SMAD2,SMAD4,SP1,ZFP82,ZNF282,ZNF436,ZNF528	0.008,0.043,-0.033,-0.033,0.066,0.026,-0.067,-0.753,0.008	0.741864
chr10:43120560-43121561	4.40549e-07	0.00949245	CDC5L	-0.675	0.74245
chr10:43076558-43077559	5.13974e-07	0.00969021	KLF15,MAZ,SP1,SP2,SP2,THAP1,ZNF263,ZNF467	-0.003,-0.003,-0.003,-0.003,0.211,0.802,0.003,-0.003	0.741702
chr10:43076710-43077711	5.87399e-07	0.00984403	KLF15,MAZ,SP1,SP2,THAP1,ZNF263,ZNF467	-0.003,-0.003,-0.003,-0.003,0.8,0.003,-0.003	0.740458
chr10:43110409-43111410	6.60824e-07	0.00996708	HAND1,KLF15,KLF3,SP1,SP3	0.026,0.06,0.06,0.298,-0.715	0.730253
chr10:43120013-43121014	7.34249e-07	0.0100678	ZNF329	0.606	0.725432
chr10:43156242-43157243	8.07674e-07	0.0101517	CTCFL,FUBP1,GATA5,SP4,ZFP28	0.109,-0.295,-0.073,0.109,0.295	0.725575
chr10:43250358-43251359	8.81099e-07	0.0102226	TFAP2B,FLI1,KLF1,KLF5,SNAI1,SP2,SP3,SP4,VEZF1	-0.01,-0.167,0.085,0.085,-0.488,-0.01,-0.01,-0.01,0.086	0.721983
chr10:43265624-43266625	9.54524e-07	0.0102835	NR1D1,PATZ1,TBX15,TBX2	0.176,2.492,-2.51,0.505	0.695574
chr10:43197752-43198753	1.02795e-06	0.0103362	LYL1	-0.552	0.693874
chr10:43253960-43254961	1.10137e-06	0.0103824	NHLH1,MYF6,CBFB,SP2,SP3,ZNF563,ZNF768	0.006,0.006,-0.349,0.016,0.008,0.006,-0.003	0.680358
chr10:43255798-43256799	1.1748e-06	0.0104231	HAND1,HEY2,RUNX2,SMAD1,TBX15	0.07,-0.001,-0.387,-0.001,0.038	0.68395
chr10:43203278-43204279	1.24822e-06	0.0104593	CLOCK,ELF5,MBD2,MXI1,MYCN,PPARD,RARG,VEZF1,ZNF281	0.109,-0.023,0.135,-0.109,-0.109,0.011,-0.011,0.077,-0.023	0.680748
chr10:43205490-43206491	1.32165e-06	0.0104917	EGR2,HAND1,MECP2,SP2,ZBTB6,ZNF563	0.069,0.046,-0.042,0.09,-0.414,-0.039	0.67858
chr10:43228322-43229323	1.4685e-06	0.0110745	MAX,MXI1,MXI1,SMAD1	-0.016,-0.016,-0.016,0.355	0.670691
chr10:43058963-43059964	1.61535e-06	0.0116019	TEAD4,ZIC2,ZIC3,ZKSCAN1,ZKSCAN3,ZNF713	0.271,-0.013,-0.013,0.013,-0.027,-0.08	0.671544
chr10:43250049-43251050	2.12932e-06	0.0145982	TFAP2B,KLF1,KLF5,SP2,SP3,SP4,VEZF1	-0.001,0.024,0.024,-0.001,-0.001,-0.001,0.284	0.669276
chr10:43221116-43222117	2.3496e-06	0.015408	CDX1	0.0	0.668733
chr18:73918014-73919015	9.10469e-06	0.0572184	CPEB1,LEF1,NFATC1,NFIC,SP3,TBX1,WT1,ZNF322	0.054,-0.011,0.054,0.153,-0.068,-0.051,-0.011,0.031	0.65798
chr1:204456576-204457577	9.76551e-06	0.0589165	EGR1,EGR2,HAND1,HOXC6,NFIA,TWIST1,ZFP82,ZNF528,ZNF816	-0.005,0.074,-0.078,0.032,-0.062,0.062,0.197,0.062,-0.013	0.64848
chr16:86954235-86955236	1.06466e-05	0.0617618	ETS2,FLI1,NFAT5,PITX2,SP2,TAF1,ZEB1,ZNF317,ZNF418	0.061,-0.019,0.061,0.005,-0.014,-0.117,-0.014,-0.066,-0.01	0.654831
chr22:37128477-37129478	1.32899e-05	0.0742404	EGR2,HAND1,NHLH1,KLF16,ZNF263,ZNF322	0.028,0.01,-0.061,0.032,0.139,-0.188	0.650514
chr9:100937771-100938772	1.50521e-05	0.0782855	AR,ETV7,FOXH1,TBX15,TGIF2LX,ZNF335,ZNF816	-0.013,-0.008,0.009,0.168,-0.013,-0.125,0.008	0.647089
chr9:100937755-100938756	1.50521e-05	0.0782855	AR,ETV7,FOXH1,TBX15,TGIF2LX,ZNF335,ZNF816	-0.013,-0.008,0.009,0.168,-0.013,-0.125,0.008	0.647089
chr11:120020704-120021705	1.58598e-05	0.0797366	ARID5B,IRF2,NKX6-1,SOX9,TEAD2,TGIF1,ZNF394,ZNF816	0.032,-0.087,-0.018,0.018,-0.165,0.027,-0.125,0.055	0.654878
chr17:8915658-8916659	1.79157e-05	0.0871673	NR2F1,ETV3,NR2F6,POU2F2,SP3,UBP1,ZNF148,ZNF317	0.024,-0.005,-0.005,0.005,0.228,0.024,0.201,-0.014	0.657084
chr17:958411-959412	1.9017e-05	0.0896345	EVX1,FOXD2,FOXG1,PAX5,PITX2,ZNF667,ZNF770,ZNF770	0.147,-0.054,0.002,-0.101,0.158,-0.054,-0.05,0.264	0.657737
chr11:108562793-108563794	2.2468e-05	0.102691	AR,FUBP1,IRF3,SMAD3,STAT1,ZNF354A,ZNF350	0.234,0.047,0.025,-0.018,0.024,0.059,-0.018	0.656265
chr12:123907334-123908335	2.3496e-05	0.104231	HAND1,IRF3,MAZ,RXRA,SMAD1,SMAD2,SMAD4,ZSCAN31	0.049,-0.018,-0.141,0.258,-0.076,-0.076,-0.076,0.089	0.646708
chr22:23815889-23816890	3.16461e-05	0.134125	AR,EVX2,NR3C1,SMAD3,TCF7,TCF7L1,TCF7L2,VDR,VEZF1	0.005,-0.005,0.005,0.038,0.112,-0.006,-0.006,0.008,-0.163	0.655374
chr10:42960168-42961169	3.20133e-05	0.134125	MAFA,PAX5,VEZF1,WT1,WT1,ZNF263,ZNF770,ZNF784	-0.115,-0.07,-0.021,-0.021,-0.021,-0.021,-0.031,0.031	0.657727
chr10:42583508-42584509	3.89886e-05	0.158934	TFAP2C,HOXA5,IRF1,IRF2,NR3C2,STAT1,STAT2,ZBTB17,ZFP28	0.034,0.28,-0.009,-0.009,-0.091,-0.009,-0.009,-0.059,0.107	0.656212
chr22:19178815-19179816	4.14116e-05	0.164369	CTCFL,CTCF,E2F6,HAND1,PLAGL1,PROX1,SP2	-0.019,-0.019,0.147,0.019,-0.224,0.056,0.096	0.649576
chr22:50473743-50474744	4.45689e-05	0.172365	EGR1,HAND1,MYF6,REST,SP4,ZBTB18,ZNF770,ZNF770	0.056,0.013,-0.076,0.018,0.013,0.01,-0.026,0.002	0.652768
chr9:126018349-126019350	5.60232e-05	0.206905	ETV7,MECOM,NR3C1,KLF5,NR1D1,THRA,ZNF770	0.07,0.078,0.07,-0.062,-0.235,0.088,0.088	0.653087
chr17:883629-884630	5.62435e-05	0.206905	FEZF1,FOXD3,POU4F3,RARG,RXRB,ZNF770	-0.045,-0.045,-0.062,0.02,-0.022,0.039	0.648799
chr6:107768708-107769709	6.22643e-05	0.2236	DDIT3,FOXD2,GLI1,HOXD13,NR2C1,NR2C2,RXRA,SOX9,ZFP28	0.004,-0.041,-0.037,0.073,0.004,0.004,-0.037,-0.139,0.004	0.645817
chr8:10431404-10432405	6.63761e-05	0.232823	TFAP2A,TFAP2C,HAND1,RUNX1,RUNX3,ZNF219,ZNF770,ZNF770	0.008,0.008,-0.008,0.015,-0.015,0.053,0.011,-0.043	0.651705
chr22:25347796-25348797	8.12079e-05	0.27391	BARX1,GLIS1,GLIS3,KLF1,POU5F1B,SALL4,SRY,ZNF354A,ZNF713	0.007,-0.029,-0.029,-0.017,-0.031,0.107,0.017,-0.045,0.099	0.649604
chr17:74466939-74467940	8.17219e-05	0.27391	BCL11A,ERG,ETV4,MAFG,MAFK,MAF,NFE2L2,TFCP2	-0.223,-0.015,-0.01,0.005,0.005,-0.005,0.005,-0.047	0.653335
chr19:43799305-43800306	9.26622e-05	0.303827	FOXG1,KLF15,MYF6,NFIA,TEF,ZNF121,ZNF770	0.022,-0.012,-0.145,0.086,0.022,-0.008,-0.058	0.648185
chr8:11417457-11418458	9.6774e-05	0.310558	DLX5,EGR2,HAND1,NR3C2,MEF2B,MEF2D,NFAT5,SPI1,ZNF331	0.004,-0.035,0.081,-0.055,0.004,0.004,0.081,-0.113,0.005	0.654597
chr4:44868925-44869926	0.000107714	0.338465	ARID3A,FOXJ3,FOXJ3,IRF5,MAZ,MEF2C,TBP,ZFP28,ZNF549	-0.016,-0.006,-0.006,-0.016,-0.212,-0.006,0.016,0.016,0.086	0.645121
chr12:117052350-117053351	0.000125924	0.379856	EGR4,ESR2,FLI1,MECP2,RXRB,ZBTB17,ZNF281,ZNF350,ZSCAN22	-0.013,0.014,0.108,-0.009,0.014,-0.013,-0.013,-0.045,0.062	0.648847
chr12:117052285-117053286	0.000125924	0.379856	EGR4,ESR2,FLI1,MECP2,RXRB,ZBTB17,ZNF281,ZNF350,ZSCAN22	-0.013,0.014,0.108,-0.009,0.014,-0.013,-0.013,-0.045,0.062	0.648847
chr8:3997539-3998540	0.000146262	0.432558	DLX1,FOXK1,GFI1B,GFI1,HOXB3,NFATC1,PRDM6,ZBTB6	-0.074,0.008,0.007,0.007,-0.106,0.077,0.008,-0.001	0.647556
chr19:8307982-8308983	0.000149567	0.433823	E2F2,EGR4,ETV5,HAND1,HLTF,ZBTB33,OSR2,ZNF354A,ZFP82	0.009,-0.007,0.037,-0.007,-0.062,0.052,0.01,0.0,0.024	0.650286
chr18:37900192-37901193	0.000152797	0.434832	FOXF1,MNX1,POU2F1,POU5F1,SOX10	0.168,-0.168,0.298,-0.046,-0.038	0.654721
chr7:2708989-2709990	0.000156248	0.435269	CTCFL,CTCF,HESX1,MECP2,PLAG1,ZNF322,ZNF554,ZNF563,ZSCAN31	0.013,0.013,0.021,0.013,-0.166,-0.075,0.007,0.007,0.013	0.651038
chr4:6732294-6733295	0.000160433	0.435269	CTCF,HSF1,PAX5,UBP1,ZNF274,ZNF341,ZNF449,ZNF554	-0.038,-0.014,0.039,-0.014,-0.135,-0.208,0.039,-0.027	0.644921
chr8:127763640-127764641	0.000161608	0.435269	FOXG1,TCF4,LMX1A,MYOG,OSR2,POU4F2,RELB,ZNF274,ZNF770	-0.082,0.03,0.03,-0.03,-0.03,0.194,0.03,-0.036,0.033	0.648785
chr15:101121620-101122621	0.000169832	0.449393	AR,FOXG1,FOXO1,MAZ,PTF1A,SMAD2,ZBTB17,ZFP82,ZIM3	-0.009,-0.009,-0.014,0.001,0.014,0.019,0.007,0.142,-0.009	0.644759
chr17:3515204-3516205	0.000173283	0.450619	DLX1,EGR2,FOXL1,HOXC10,NR2E3,POU6F1,TBX15,TEAD4,ZNF219	0.018,0.047,-0.075,0.018,-0.018,0.018,0.047,0.042,-0.05	0.643201
chr10:43264065-43265066	0.000177982	0.454994	MAZ,PATZ1,RELA,ZFP64,ZIC4,ZNF467	0.142,-0.152,0.141,0.412,-0.142,0.104	0.652553
chr17:79685671-79686672	0.000207425	0.521426	GFI1B,NKX6-1,NR1H4,ZNF146,PPARG,ZNF547	-0.022,-0.022,-0.063,-0.197,-0.08,-0.016	0.654573
chr1:27031395-27032396	0.00021888	0.5412	E2F6,NR1D1,TEAD1,TEAD2,TEAD4,THRA,VEZF1,ZBTB6	-0.067,0.302,0.008,0.008,0.008,0.008,-0.024,-0.288	0.644064
chr17:79271983-79272984	0.000228865	0.544805	HAND1,PLAGL1,RFX1,RFX1,RFX2,THAP1,VEZF1,ZNF281	0.002,-0.082,-0.001,-0.001,-0.001,-0.001,0.061,-0.004	0.655874
chr13:52791827-52792828	0.000233344	0.544805	AR,BPTF,MAF,MYF6,RARG,RREB1,TCF7,ZBTB6,ZFX	-0.016,0.088,-0.01,-0.002,0.029,-0.044,0.044,-0.029,0.009	0.64687
chr1:102660965-102661966	0.000239071	0.544805	FOXL1,HMGA1,HOXA11,OVOL1,SOX7,ZBED1,ZNF770	0.092,0.065,0.041,0.083,0.083,-0.014,-0.014	0.648947
chr1:41116941-41117942	0.000240246	0.544805	ERG,ETV5,FLI1,MYB,POU3F3,POU3F4,RFX2,ZNF354A	0.091,0.091,0.091,-0.071,-0.013,-0.013,-0.025,-0.003	0.643878
chr6:33642354-33643355	0.000247295	0.544805	KLF16,PATZ1,SALL4,SMAD3,TBX20,THRA,ZNF335,ZSCAN31	-0.009,-0.056,0.029,-0.004,-0.004,0.017,-0.064,-0.064	0.647337
chr14:72651722-72652723	0.000251994	0.544805	ASCL1,CREB3,GLI1,GLI2,GLI3,POU5F1,SP4,SPIC,ZNF219	0.051,-0.053,-0.013,-0.013,-0.013,0.253,0.017,-0.014,-0.013	0.655969
chr3:27559538-27560539	0.000255886	0.544805	THRB,ZNF219,ZNF341	-0.002,0.002,0.205	0.652544
chr10:22436356-22437357	0.00025662	0.544805	E2F7,EGR2,ELK4,ETV1,HAND1,MXI1,RREB1,SMAD1	0.046,0.225,0.023,0.023,-0.046,-0.04,-0.04,0.108	0.650038
chr10:22436164-22437165	0.00025662	0.544805	E2F7,EGR2,ELK4,ETV1,HAND1,MXI1,RREB1,SMAD1	0.046,0.225,0.023,0.023,-0.046,-0.04,-0.04,0.108	0.650038
chr10:22436252-22437253	0.00025662	0.544805	E2F7,EGR2,ELK4,ETV1,HAND1,MXI1,RREB1,SMAD1	0.046,0.225,0.023,0.023,-0.046,-0.04,-0.04,0.108	0.650038
chr15:81909035-81910036	0.000260071	0.544805	TFAP2A,OLIG2,TAL1,WT1,ZIC4	0.026,-0.016,-0.016,0.029,0.198	0.648666
chr1:26164250-26165251	0.000267781	0.553271	NR2C2,ZBTB17,ZBTB4,ZFX,ZNF322,ZNF524,ZNF586,ZSCAN22	0.009,-0.022,-0.066,-0.016,-0.009,-0.062,-0.04,0.259	0.654488
chr11:64384059-64385060	0.000278647	0.567607	TFAP2A,BCL6,PITX2,PLAGL1,SP1,SP2,ZBTB4,ZIC2	0.052,-0.052,-0.083,-0.052,0.06,0.177,0.052,-0.052	0.641953
chr19:7685665-7686666	0.000282245	0.567607	CEBPA,CEBPB,CEBPD,KLF6,POU3F3,VEZF1,ZNF341,ZNF467	0.001,0.001,0.001,0.031,0.009,0.007,-0.004,-0.188	0.646093
chr1:204456715-204457716	0.000294214	0.579387	HAND1,NFIA,TWIST1,ZFP82,ZNF528	-0.008,-0.028,0.028,0.08,0.028	0.644387
chr21:45331025-45332026	0.000307503	0.579387	NKX2-5,RARA,RARG,TBX15,THAP1,ZNF354A,ZNF219,ZNF768	-0.043,0.1,0.1,0.102,0.02,0.063,0.102,-0.02	0.657875
chr21:45331137-45332138	0.000307871	0.579387	NKX2-5,RARA,RARG,TBX15,THAP1,ZNF354A,ZNF219,ZNF768	-0.043,0.1,0.1,0.102,0.02,0.063,0.102,-0.02	0.657956
chr21:45331187-45332188	0.000307871	0.579387	NKX2-5,RARA,RARG,TBX15,THAP1,ZNF354A,ZNF219,ZNF768	-0.043,0.1,0.1,0.102,0.02,0.063,0.102,-0.02	0.657956
chr10:117803725-117804726	0.000312129	0.579387	ATF4,CEBPG,DDIT3,SRF,ZNF148,ZNF335,ZNF740,ZNF768	-0.017,-0.017,-0.017,0.118,-0.209,-0.013,-0.056,-0.043	0.655522
chr10:42979445-42980446	0.000312937	0.579387	WT1,ZNF467	-0.0,-0.0	0.653178
chr4:6732752-6733753	0.000314993	0.579387	CTCF,E2F3,E2F6,FOXD2,NR1H3,SMAD1,THRB,ZNF341,ZNF449	-0.174,-0.09,-0.09,0.002,0.002,-0.393,0.002,-0.627,0.18	0.645226
chr5:1199815-1200816	0.000325346	0.59122	GLIS2,GLIS3,ZBTB17,ZNF121,ZNF148,ZNF341,ZNF341,ZNF770	-0.024,-0.024,0.226,0.037,0.075,-0.048,0.048,-0.107	0.6409
chr1:41045924-41046925	0.000336213	0.600673	ZNF322,ZNF582,ZNF18	0.062,0.062,-0.04	0.650753
chr17:30728081-30729082	0.000342233	0.600673	BPTF,EGR3,ETV7,FOXP3,TP63,TP73,PATZ1,RREB1,ZNF768	0.124,-0.154,0.024,0.083,0.021,0.021,0.042,-0.069,-0.024	0.652082
chr16:81520520-81521521	0.000346786	0.600673	FLI1,GLIS3,IKZF1,KLF8,MAZ,SP1,SP2,ZFP82,ZNF219	-0.117,-0.002,0.015,-0.002,0.002,0.002,0.002,-0.078,-0.042	0.647594
chr5:147578592-147579593	0.000348548	0.600673	T,HOXC6,IRF4,TCF7L1,ZNF136,ZNF770	0.003,-0.087,-0.073,-0.069,0.069,-0.092	0.642558
chr1:2165975-2166976	0.000359709	0.600673	FIGLA,HAND1,SP2,TBX15,ZNF274,ZNF335	-0.017,-0.101,-0.04,-0.043,0.038,0.061	0.640543
chr12:114355137-114356138	0.000360002	0.600673	MAZ,PATZ1,RFX2,STAT6,WT1,ZBTB17,ZNF134	-0.14,0.015,0.007,-0.027,0.015,-0.016,0.007	0.646546
chr5:1199521-1200522	0.000365509	0.600673	IRF3,ZBTB17,ZNF148,ZNF341,ZNF341,ZNF770	0.004,0.145,0.02,-0.002,0.002,-0.046	0.641262
chr5:107217604-107218605	0.000366023	0.600673	ETV2,NR1H3,RARA,RARB,VAX1,ZNF341	-0.032,-0.03,-0.03,-0.03,-0.312,0.032	0.659933
chr6:168838846-168839847	0.00036639	0.600673	NHLH1,MYOD1,NFIA,SNAI2,ZNF320,ZNF341,ZNF467	0.01,-0.025,-0.02,-0.025,-0.03,0.051,0.026	0.64465
chr16:50520978-50521979	0.0003799	0.61393	GATA3,SMARCA1,SOX10,SPI1,SPIB,ZNF324,ZFP28,ZNF768	0.018,-0.049,0.064,0.015,0.015,-0.007,-0.007,-0.065	0.64677
chr6:96693950-96694951	0.000382617	0.61393	GLI2,GLI3,NFIC,OLIG2,OLIG2,ZNF354A,ZNF467,ZNF713	0.008,0.008,-0.009,0.018,0.018,-0.034,0.06,-0.034	0.653206
chr14:72651498-72652499	0.000392676	0.620635	ASCL1,CREB3,GLI1,GLI2,GLI3,POU5F1,SP4,ZNF219	0.034,-0.035,-0.009,-0.009,-0.009,0.237,0.006,-0.009	0.655583
chr10:86958138-86959139	0.000395026	0.620635	FOXP3,MECP2,TP53,TP63,TP73,POU4F3,ZFX,ZNF467	0.062,-0.022,0.047,0.047,0.047,-0.001,-0.003,-0.024	0.648085
chr9:38672792-38673793	0.000407949	0.633508	ETV3,HOXD12,KLF16,SP1,TEAD3,TLX1,ZNF770,ZNF18	0.345,0.021,0.292,0.168,-0.09,-0.168,0.239,-0.335	0.642777
chr9:11765297-11766298	0.00041162	0.633508	EHF,ELF3,SALL4,SP2,SP4,TEAD3	-0.003,-0.003,-0.006,0.126,0.029,-0.093	0.64463
chr19:1122500-1123501	0.000419844	0.639222	KLF13,KLF14,KLF16,KLF9,PATZ1,ZNF335	-0.013,-0.013,0.159,0.039,0.014,-0.013	0.643554
chr11:58024284-58025285	0.000423809	0.639222	IRF9,NFIC,NRF1,ONECUT2,TBX19,ZNF136,ZNF274,ZNF770	-0.127,-0.009,-0.02,0.007,-0.007,0.007,0.107,-0.014	0.653435
chr1:11645549-11646550	0.000433574	0.647476	CPEB1,CTCF,ETV7,SMAD2,SMAD4,SOX8	0.012,0.056,0.016,0.015,0.015,-0.122	0.650857
chr7:66145793-66146794	0.000450021	0.66016	ETS2,HOMEZ,MAFA,NFAT5,PRDM6,VEZF1,ZNF502,ZNF41	-0.02,0.193,-0.069,0.02,0.02,-0.009,0.02,0.01	0.645531
chr10:76449-77450	0.000455455	0.66016	CTCFL,CTCF,ELF5,ETV7,IRF8,PITX2,XBP1,ZNF350	-0.062,-0.062,0.036,-0.006,-0.02,-0.031,-0.002,-0.006	0.644206
chr16:12551546-12552547	0.000462797	0.66016	FIGLA,FOXD3,FOXH1,KLF6,STAT2	-0.057,0.037,-0.014,0.088,-0.012	0.646393
chr14:68988485-68989486	0.000467496	0.66016	MECOM,HMGA2,KLF16,NR6A1,ZNF140,ZNF148,ZNF219,ZNF320,ZNF740	-0.033,-0.033,0.169,-0.066,-0.075,-0.249,-0.404,0.015,-0.112	0.649857
chr14:68988505-68989506	0.000467496	0.66016	MECOM,HMGA2,KLF16,NR6A1,ZNF140,ZNF148,ZNF219,ZNF320,ZNF740	-0.033,-0.033,0.169,-0.066,-0.075,-0.249,-0.404,0.015,-0.112	0.649857
chr18:37287178-37288179	0.000480346	0.66016	AR,FOXD1,NR3C1,NHLH1,KLF6,ZNF770	0.018,0.018,0.018,0.055,0.134,-0.078	0.648437
chr5:179611525-179612526	0.000480786	0.66016	FOXH1,NFKB2,PAX5,PITX2,SMAD3,TEAD2,ZIM3,ZNF274,ZNF770	-0.006,0.012,0.097,-0.012,-0.042,-0.006,0.023,0.069,-0.004	0.642691
chr3:126013328-126014329	0.000484237	0.66016	BCL11A,CPEB1,CXXC1,FLI1,MECP2,PAX5,ZNF121,ZNF770	0.022,0.022,0.071,0.022,0.052,0.019,0.019,0.055	0.64898
chr3:126013297-126014298	0.000484751	0.66016	BCL11A,CPEB1,CXXC1,FLI1,MECP2,PAX5,ZNF121,ZNF770	0.022,0.022,0.071,0.022,0.052,0.019,0.019,0.055	0.648961
chr1:180194575-180195576	0.000492094	0.66016	HOXA11,KLF15,KLF3,MAZ,ZBTB17,ZNF341	0.007,0.013,-0.044,0.006,-0.003,-0.037	0.651434
chr3:40988811-40989812	0.00049437	0.66016	DMRT1,MECOM,FOXD3,GATA5,ZNF335,ZNF816	-0.057,0.16,-0.027,-0.072,-0.027,0.253	0.649962
chr17:79686028-79687029	0.00049459	0.66016	NR1H4,ZNF146,PPARG,RARG,ZFX,ZNF547,ZNF816,ZNF816	-0.068,-0.201,-0.081,0.003,0.003,-0.019,0.003,0.003	0.651539
chr2:85089340-85090341	0.000502226	0.664087	CLOCK,KLF16,LYL1,MAFA,PRDM6,SMAD1,SMAD3	-0.007,-0.005,-0.007,0.005,0.174,-0.01,0.01	0.645598
chr14:72388688-72389689	0.000506338	0.664087	ETV7,GLI1,GLI2,OSR2,SPDEF,TCF7,ZNF382,ZNF41,ZSCAN16	-0.124,-0.18,-0.18,0.125,-0.05,-0.448,-0.007,-0.038,-0.05	0.645617
chr3:196198827-196199828	0.0005186	0.668884	HEY2,MEIS2,NR1H4,PAX5,SMAD1,TBX1,ZNF121,ZNF263,ZNF816	0.118,-0.101,0.019,0.009,-0.019,0.047,0.009,0.031,0.029	0.648394
chr10:11242247-11243248	0.000529614	0.668884	ASCL1,GLI2,INSM1,MAZ,SOX3,ZNF528,ZNF768	-0.031,-0.005,0.005,0.032,0.003,0.003,-0.095	0.652391
chr10:485932-486933	0.000533799	0.668884	BCL11A,ZBTB33,NKX3-1,RFX1,SOX15,ZBTB48,ZIM3,ZNF250	-0.008,0.003,0.001,0.003,-0.003,0.011,-0.047,-0.129	0.647475
chr11:120033846-120034847	0.000537103	0.668884	MEF2A,MEF2B,MEF2C,MEF2D,NFIA,SNAI1,VEZF1,ZNF467,ZNF490	-0.001,-0.001,-0.001,-0.001,-0.08,-0.08,0.013,0.013,-0.075	0.648661
chr11:125696980-125697981	0.00054283	0.668884	HOXC6,NKX6-1,OVOL2,SMARCA1,TEAD4,ZFP82,ZNF317,ZNF768	-0.033,-0.215,0.012,-0.012,-0.009,-0.009,0.033,-0.038	0.652915
chr4:4913382-4914383	0.000543932	0.668884	HAND1,ZNF146,POU3F2,SP4,ZNF547	-0.069,-0.002,-0.101,0.047,-0.055	0.641457
chr9:133274842-133275843	0.00054797	0.668884	HEY2,KLF3,THAP1,ZFX,ZNF331,ZNF467,ZNF816	0.389,0.038,-0.314,0.047,0.314,-0.048,-0.367	0.649347
chr1:22583769-22584770	0.000552155	0.668884	TFAP2B,MLXIPL,REST,SMAD1,SOX13,UBP1,ZNF274,ZNF467,ZNF586	0.337,0.344,0.21,-0.034,-0.307,0.172,0.172,-0.307,-0.114	0.642887
chr16:4081439-4082440	0.00055869	0.668884	DMRT1,FOXF1,NR1H3,PROX1,RREB1,WT1,ZBTB17,ZNF121	0.193,-0.025,0.012,-0.094,0.012,-0.052,-0.011,-0.001	0.650471
chr18:76990685-76991686	0.000559718	0.668884	TFAP2B,CXXC1,IRX2,MAFA,NR1D1,NR1H3,SMAD2,VEZF1	-0.063,0.065,-0.021,-0.094,0.028,-0.078,-0.021,-0.061	0.642553
chr4:120719503-120720504	0.000563756	0.668884	T,HMGA2,MEOX2,OSR2,ZNF232,ZNF418	0.04,0.073,0.169,-0.144,0.046,-0.012	0.650424
chr9:15999096-16000097	0.000565372	0.668884	ETV5,FLI1,PRDM6,VEZF1,ZNF770	0.052,0.048,-0.114,0.013,0.014	0.640467
chr10:43069202-43070203	0.000567648	0.668884	POU3F4	0.0	0.657332
chr3:158865345-158866346	0.000584609	0.68353	GRHL2,IRF3,PATZ1,PRDM6,SOX9,TAF1,ZBTB17	-0.123,-0.024,0.036,-0.014,-0.046,0.036,-0.035	0.647146
chr6:170366242-170367243	0.000592539	0.687473	MAZ,SP1,STAT2,ZNF350	-0.065,-0.065,0.024,0.126	0.643011
chr7:50721130-50722131	0.000608546	0.6911	FOSB,FOS,JUN,NKX6-1,ZNF341	0.005,0.005,0.005,0.121,0.109	0.652887
chr17:79279974-79280975	0.000610675	0.6911	MEF2B,TEAD1,TEAD2	-0.065,0.064,0.064	0.656522
chr6:73573615-73574616	0.000619559	0.6911	BARX2,LMX1A,MSX2,MYF6,ZNF121,ZNF770,ZNF770	-0.012,-0.142,-0.012,0.002,-0.084,0.017,0.017	0.64999
chr15:101312611-101313612	0.00062044	0.6911	MAFA,PAX5,ZIC2,ZIC3,ZNF329,ZNF554,ZNF770	-0.086,0.075,-0.022,-0.022,0.022,-0.015,-0.015	0.641939
chr2:188692837-188693838	0.000621615	0.6911	MECP2,POU3F2,SMAD1,SP1,TBX19,VEZF1,ZNF281,ZNF8,ZSCAN22	0.067,0.047,-0.067,0.034,-0.233,0.023,0.034,-0.047,-0.023	0.651339
chr21:43345851-43346852	0.000623157	0.6911	NR2F1,EGR1,EGR2,ETV7,MAZ,PLAGL1,ZNF263,ZNF490,ZNF816	0.051,0.02,0.02,-0.012,0.02,-0.012,0.028,0.064,0.012	0.648551
chr10:70887514-70888515	0.000631601	0.691998	HNF1A,HNF1B,TBX15,THRA,ZBTB6,ZNF148,ZNF524	-0.107,-0.107,0.082,-0.224,-0.224,0.256,0.14	0.649338
chr6:40348953-40349954	0.000633143	0.691998	DPRX,RHOXF1,WT1,WT1,HIVEP1,ZNF329,ZNF770,ZSCAN22	0.036,0.036,-0.036,-0.04,-0.036,0.07,0.049,0.562	0.642158
chr22:50581873-50582874	0.000641293	0.695863	ELK1,FEV,FLI1,TBX21,ZNF324	0.015,0.015,0.055,0.064,0.064	0.646369
chr10:43265911-43266912	0.000655538	0.699387	NR1D1,PATZ1,TBX15	0.213,2.691,-2.507	0.65394
chr7:1537237-1538238	0.000661191	0.699387	TFAP2B,BHLHA15,FOXA3,GLI1,NHLH1,OLIG2,PTF1A,RREB1,SP1	-0.03,0.013,-0.004,0.054,0.013,0.013,0.013,0.03,0.035	0.649433
chr11:119907886-119908887	0.000666918	0.699387	DMBX1,HMGA1,KLF15,ZBTB17,ZNF467,ZNF502,ZNF41	0.186,-0.006,-0.031,-0.034,-0.079,-0.033,-0.032	0.649566
chr6:167248696-167249697	0.000667212	0.699387	ETV7,GLIS3,NFKB1,NR1H4,RREB1,SMAD4,STAT6,TBX15,VEZF1	-0.019,0.046,-0.005,0.003,0.044,0.005,-0.019,0.046,0.093	0.642806
chr1:16115896-16116897	0.000667726	0.699387	ARID3A,GFI1B,GFI1,PATZ1,STAT1,STAT2,ZNF554,ZNF713	-0.005,-0.027,-0.027,-0.008,-0.005,-0.005,-0.105,0.027	0.646269
chr8:119855814-119856815	0.000679768	0.70183	CXXC1,ETV7,FLI1,NR2E3,SMAD3,SP2,TBX15,ZNF467	0.002,-0.005,-0.005,0.141,0.027,0.017,0.017,0.017	0.64726
chr12:114355467-114356468	0.000680575	0.70183	IRF3,MAFA,MAZ,PATZ1,STAT6,WT1,ZNF121	-0.089,-0.048,-0.241,0.034,-0.08,0.034,-0.047	0.644492
chr1:203521920-203522921	0.0006841	0.70183	EGR2,HAND1,PRRX1,RREB1,VEZF1,ZNF140,ZNF467	-0.031,-0.006,-0.036,-0.029,0.047,0.043,0.045	0.649366
chr22:37133223-37134224	0.000693939	0.70183	FOXO1,PATZ1,ZNF467,ZNF768	-0.019,-0.019,-0.1,0.019	0.64747
chr3:12187015-12188016	0.000694967	0.70183	EGR4,FLI1,FOXG1,MAZ,NR0B1,ONECUT2,POU3F3,ZNF140	0.695,-0.253,-0.628,-0.002,0.096,0.048,0.048,0.039	0.644678
chr9:135582538-135583539	0.000697977	0.70183	EGR3,ESR2,GCM1,NFIC,TP73,ZBTB18,ZNF282,ZNF320	-0.011,-0.004,0.004,-0.068,0.011,-0.108,0.002,0.002	0.64554
chr5:147578519-147579520	0.000706054	0.703558	T,HOXC6,IRF4,NFATC4,NR2F6,POU3F3,TCF7L1,ZNF136	0.045,-0.156,-0.131,0.03,0.03,-0.045,-0.087,0.087	0.644921
chr14:72804644-72805645	0.000711708	0.703558	HOXC8,SPIC,TBX15,TBX2,ZFP28,ZNF770,ZNF770	0.019,0.093,0.008,0.053,0.119,-0.008,-0.008	0.653921
chr3:19146630-19147631	0.00071369	0.703558	KLF16,SP1,VEZF1,WT1,ZNF148	0.02,0.058,-0.099,0.041,0.041	0.641362
chr1:57750864-57751865	0.000733662	0.717825	E2F3,HLTF,SCRT1,SCRT2,SMAD1,TBX15,ZNF768	0.03,0.03,0.005,0.005,0.038,-0.109,0.095	0.642782
chr1:1287089-1288090	0.0007482	0.717825	EGR1,MYF6,NR1H4,SP2,ZNF324,ZNF320	0.013,-0.119,-0.034,-0.029,-0.003,-0.029	0.649766
chr16:84293945-84294946	0.000750256	0.717825	KLF6,ONECUT2,PAX5,ZIC1,ZNF121,ZNF136,ZNF350	-0.01,-0.013,-0.027,0.003,-0.027,0.007,0.013	0.651081
chr1:20291131-20292132	0.000752385	0.717825	IRF5,OSR2,VEZF1,ZFP28,ZNF263,ZNF335,ZSCAN22,ZSCAN4	-0.029,0.068,-0.001,0.02,-0.03,-0.008,0.008,-0.03	0.65424
chr10:123743142-123744143	0.000753927	0.717825	AR,TFAP2A,TFAP2B,TFAP2C,NHLH1,OSR2,REST,ZNF436,ZNF549	0.013,0.027,0.068,0.027,-0.028,0.061,-0.007,0.04,-0.013	0.649123
chr2:111199175-111200176	0.000756717	0.717825	NR2F1,HAND1,NR2E1,PATZ1,REL,TBX3,ZFP64,ZNF317	0.165,-0.145,-3.123,1.626,0.161,0.33,1.626,-0.165	0.646398
chr4:185352249-185353250	0.000778818	0.722376	FUBP1,IRF3,MNX1,MYF6,NANOG,NR1I2,PRDM14,ZNF214,ZNF563	0.105,0.141,-0.027,-0.508,0.027,0.027,0.027,-0.317,0.06	0.647499
chr10:92643926-92644927	0.000779626	0.722376	ARID3A,T,IRF5,LMX1B,MEF2A,NR1D1,RORC,TBX19,ZNF260	-0.05,0.005,-0.005,-0.071,-0.071,0.018,0.018,0.007,-0.037	0.646036
chr5:178350508-178351509	0.00079387	0.722376	E2F3,E2F4,MAFB,NFIA,SREBF2,TFCP2,ZNF335,ZNF680,ZNF85	0.041,0.041,0.044,0.014,-0.002,-0.041,-0.041,-0.001,-0.001	0.647341
chr5:178350514-178351515	0.00079387	0.722376	E2F3,E2F4,MAFB,NFIA,SREBF2,TFCP2,ZNF335,ZNF680,ZNF85	0.041,0.041,0.044,0.014,-0.002,-0.041,-0.041,-0.001,-0.001	0.647341
chr12:53241255-53242256	0.000795045	0.722376	HAND1,PATZ1,SP4,TBX15,ZNF341,ZNF770,ZNF816	0.066,-0.003,-0.003,-0.003,0.047,-0.093,-0.03	0.651105
chr16:81520382-81521383	0.000801213	0.722376	FLI1,GLIS3,IKZF1,KLF8,MAZ,SP1,SP2,ZFP82	-0.117,-0.002,0.015,-0.002,0.002,0.002,0.002,-0.078	0.647146
chr5:168796844-168797845	0.000819789	0.722376	KLF3,NFYB,SOX15,ZIM3,ZNF410,ZSCAN16	0.25,-0.057,0.063,0.063,0.057,-0.057	0.64504
chr4:8044362-8045363	0.000822873	0.722376	HAND1,IRF3,NRF1,PLAGL1,POU3F4,STAT5B,ZNF394,ZNF418	0.077,-0.032,0.005,-0.077,-0.039,-0.005,0.021,0.021	0.642777
chr17:81538001-81539002	0.000826177	0.722376	FLI1,MYOD1,MYOG,PLAGL1,SREBF2,TBX20,ZNF770	-0.051,-0.005,-0.005,-0.01,0.005,-0.058,0.0	0.649685
chr2:44906557-44907558	0.000854225	0.722376	IRF1,IRF2,IRF3,IRF5,POU4F1,RARA,TEAD2,ZNF148,ZNF770	-0.003,-0.003,-0.003,0.037,-0.125,0.003,-0.015,-0.003,-0.037	0.648804
chr2:45235706-45236707	0.000858631	0.722376	MYNN,PATZ1,POU3F4,SPIB,TEAD3,ZBTB17,ZFX,ZNF281,ZNF341	0.033,-0.019,0.106,0.019,-0.009,-0.019,0.066,-0.019,-0.019	0.650567
chr7:120791697-120792698	0.00086333	0.722376	BACH1,BACH2,CTCF,DLX1,NFE2L2,NFE2,TP53,PBX2,POU1F1	0.01,0.01,0.011,0.016,0.01,0.01,0.032,-0.016,-0.011	0.646803
chr12:53675969-53676970	0.000865092	0.722376	ESR2,HESX1,MECP2,PTF1A,REST,ZNF263,ZNF652,ZNF768	0.11,-0.115,-0.128,-0.148,-0.125,-0.11,-0.09,0.11	0.651024
chr11:134725445-134726446	0.000872802	0.722376	E2F1,E2F4,ETV3,HMGA1,NFATC3,NR0B1,CBFB,ZSCAN31	-0.149,-0.149,0.052,0.211,0.309,0.309,-0.288,-0.726	0.644745
chr1:16012752-16013753	0.000878529	0.722376	MAZ,MYF6,NFIC,SP3,ZBTB17,ZNF768	-0.057,0.141,-0.06,0.073,-0.071,0.024	0.649742
chr22:43022688-43023689	0.000880732	0.722376	IRF2,PITX2,ZFP28,ZNF490,ZNF770,ZNF816,ZNF816	0.101,-0.015,0.092,-0.01,0.074,-0.013,-0.013	0.648385
chr4:107646128-107647129	0.000901511	0.722376	IRF5,KLF16,SP1,SP4,TBX15,ZNF418,ZNF784,ZNF816	0.027,0.025,0.025,-0.007,-0.027,-0.007,0.055,0.075	0.649471
chr4:107646134-107647135	0.000901511	0.722376	IRF5,KLF16,SP1,SP4,TBX15,ZNF418,ZNF784,ZNF816	0.027,0.025,0.025,-0.007,-0.027,-0.007,0.055,0.075	0.649471
chr19:38263770-38264771	0.000912451	0.722376	ETV7,NHLH1,JUNB,SMAD3,SP1,WT1,ZIC2,ZNF436	0.109,0.099,-0.081,0.045,0.325,-0.48,0.045,0.109	0.642615
chr19:38263880-38264881	0.000912892	0.722376	ETV7,NHLH1,JUNB,KLF5,SMAD3,SP1,WT1,ZIC2,ZNF436	0.045,0.076,-0.078,-0.016,0.041,0.309,-0.466,0.041,0.045	0.642539
chr19:38263705-38264706	0.000913553	0.722376	ETV7,NHLH1,JUNB,SMAD3,SP1,WT1,ZIC2,ZNF436	0.027,0.049,-0.064,0.023,0.24,-0.385,0.023,0.027	0.642558
chr6:88528330-88529331	0.000920528	0.722376	BCL11A,MEIS1,MYOD1,MYOG,POU5F1,PPARD,SOX3,TCF3,TGIF1	-0.027,-0.0,0.0,-0.0,-0.019,-0.039,-0.039,0.096,-0.0	0.644707
chr8:102238990-102239991	0.00092787	0.722376	BRCA1,FOXO1,FOXO4,KLF16,PTF1A,SP3,SP4,VEZF1	0.004,0.022,0.004,0.028,-0.02,0.003,-0.005,0.033	0.644964
chr2:233213576-233214577	0.000928678	0.722376	EGR2,KLF8,TP53,PDX1,PITX3,RFX5,SRF,ZNF770,ZNF85	0.035,0.035,-0.07,-0.104,0.174,-0.128,0.07,-0.062,0.072	0.646631
chr11:109605051-109606052	0.000929412	0.722376	AR,FOXJ3,NR3C1,IRF3,PGR,VEZF1,ZNF354A,ZNF350,ZSCAN22	0.045,0.126,0.045,-0.062,0.045,0.199,-0.062,0.394,-0.26	0.640467
chr14:68988127-68989128	0.00093323	0.722376	AR,KLF16,NR6A1,ZNF140,ZNF148,ZNF219,ZNF320,ZNF740,ZNF770	-0.047,0.074,-0.045,-0.054,-0.101,-0.288,0.029,-0.064,-0.068	0.649209
chr10:95431576-95432577	0.000938884	0.722376	NFKB2,REL,RREB1,TBX15,ZFX	-0.072,0.072,-0.051,-0.054,-0.018	0.643978
chr1:234538533-234539534	0.000943363	0.722376	ETS2,IRF5,MNX1,TP53,PRDM6,SPDEF,ZNF324,ZBTB17,ZNF350	0.764,-0.037,1.214,-0.719,-2.221,0.114,0.114,0.114,1.214	0.644978
chr12:62786107-62787108	0.000948209	0.722376	FLI1,FOXF1,HAND1,HOXA11,HOXC11,HOXC12,MAZ,ZNF467,ZNF708	-0.261,0.045,0.059,-0.018,-0.018,-0.018,0.046,0.146,-0.059	0.6505
chr9:17268439-17269440	0.00095423	0.722376	CDX1,NFATC1,POU3F1,POU3F3,TWIST1,ZNF214,ZNF582,ZNF85	0.047,-0.017,-0.017,0.045,0.008,-0.079,0.008,0.021	0.644902
chr8:144762206-144763207	0.000956139	0.722376	T,MECP2,OLIG2,SOX10,SOX9,THRA,ZNF219,ZNF341	-0.026,0.082,0.009,0.005,0.005,-0.089,-0.065,-0.009	0.641653
chr12:39198669-39199670	0.000957608	0.722376	GSX1,IRF3,KLF15,NKX2-5,REST,RREB1,ZNF354A,ZNF713	0.036,-0.068,-0.029,-0.029,-0.089,0.047,0.031,0.171	0.65393
chr6:167407427-167408428	0.000965023	0.722376	ASCL1,FOXB1,FOXD1,FOXD2,TCF12,MAZ,PPARG,ZNF264	0.034,0.003,0.003,0.003,-0.122,-0.035,-0.052,0.043	0.646431
chr6:33643061-33644062	0.000974275	0.722376	KLF16,MAF,POU2F2,POU5F1,SALL4,THRA,ZNF121	-0.009,-0.135,0.008,0.008,0.029,0.017,0.009	0.645388
chr20:46648312-46649313	0.000979708	0.722376	IRF3,MAZ,PLAG1,TLX1,VEZF1,WT1,ZNF121,ZNF136	0.0,0.0,0.088,0.035,0.0,0.195,0.028,0.035	0.642763
chr17:44848662-44849663	0.000986243	0.722376	GLIS1,KLF3,PAX5,SMAD3,SP3,TWIST1,ZNF134,ZNF331,ZNF770	0.145,-0.184,-0.211,0.138,0.14,-0.138,-0.005,-0.145,-0.142	0.645436
chr5:176676124-176677125	0.00098874	0.722376	BACH1,CLOCK,ETS2,FOXG1,NFATC1,PPARD,SPIC,ZFP82,ZNF586	-0.483,0.202,-0.087,0.087,-0.087,-0.335,-0.287,0.154,-0.287	0.648966
chr18:57535776-57536777	0.000990575	0.722376	CLOCK,HOXC6,NFATC1,NRF1,PLAG1,RELB	-0.024,0.013,-0.013,-0.093,0.085,-0.108	0.647298
chr6:40349469-40350470	0.000992778	0.722376	FOXG1,LEF1,TCF7L2,ZSCAN22	0.003,0.003,0.003,0.169	0.642353
chr8:32548368-32549369	0.00099733	0.722376	EGR2,KLF6,ZFX,ZNF263,ZNF467	0.148,0.116,-0.053,-0.14,-0.121	0.652377
chr14:68814264-68815265	0.000997991	0.722376	ETV3,IRF3,KLF6,SP4,TBX1,WT1,ZIM3,ZNF263,ZNF770	-0.068,-0.049,0.023,0.023,0.023,-0.031,-0.065,-0.038,-0.023	0.642344

## Sheet: Promoters
Location in hg38	Gene symbol	P-value	FDR Q-value	Selected motifs		AUROC
				TF names	Model coefficients of motifs
chr10:43137986-43138986	CSGALNACT2	1.23777e-07	0.00541282	AR,CPEB1,FOXG1,HOXC10,NR1D1,SREBF2,THAP11,ZNF331,ZNF76	-0.035,-0.035,-0.035,-0.035,-0.035,-0.203,-0.203,-0.027,-0.203	0.732454
chr10:43137834-43138834	RP11-351D16.3	1.23777e-07	0.00541282	SREBF2,THAP11,ZNF76	-0.144,-0.144,-0.144	0.720868
chr10:43203319-43204319	RASGEF1A	2.47554e-07	0.00721709	CLOCK,MBD2,MYCN	0.149,0.075,-0.149	0.673354
chr1:41046169-41047169	SCMH1	7.55038e-06	0.153724	IRF1,IRF2,IRF3,IRF5,ZNF146,SOX10,ZNF260,ZNF322,ZNF582	-0.011,-0.011,-0.05,-0.011,-0.043,0.017,0.043,0.091,0.091	0.657527
chr20:45934128-45935128	PCIF1	8.78815e-06	0.153724	KLF14,NRF1,VEZF1,ZFP64,ZNF436,ZNF768,ZNF770	0.026,-0.196,-0.088,0.018,-0.034,0.241,0.034	0.656622
chr20:45934233-45935233	PCIF1	1.17588e-05	0.171406	KLF14,NRF1,VEZF1,ZNF436,ZNF768,ZNF770	0.026,-0.196,-0.088,-0.034,0.243,0.034	0.656427

## Sheet: Genes
Promoter location in hg38	Gene symbol	P-value	FDR Q-value	Selected motifs		AUROC
				TF names	Model coefficients of motifs
chr10:43137834-43138834	RP11-351D16.3	4.03184e-07	0.0049505	CDC5L,MXI1,SNAI1,SOX2,THAP1,VDR,ZBTB18	-0.087,-0.008,-0.022,0.004,0.075,-0.354,0.469	0.797029
chr10:43137986-43138986	CSGALNACT2	4.03184e-07	0.0049505	CDC5L,MXI1,SNAI1,SOX2,THAP1,VDR,ZBTB18	-0.087,-0.008,-0.022,0.004,0.075,-0.354,0.469	0.797029
chr10:42871021-42872021	RP11-124O11.1	8.06368e-07	0.00660066	CDC5L,RUNX2,SNAI1,THAP1,VDR,ZBTB18	-0.069,-0.008,-0.006,0.066,-0.339,0.477	0.792817
chr10:43076579-43077579	RET	1.20955e-06	0.00742574	CDC5L,MXI1,RUNX2,SNAI1,THAP1,VDR,ZBTB18	-0.084,-0.006,-0.003,-0.021,0.075,-0.354,0.471	0.793156
chr10:43266419-43267419	RASGEF1A	1.61274e-06	0.00792079	CDC5L,CBFB,SNAI1,THAP1,VDR,ZBTB18	-0.086,-0.002,-0.015,0.07,-0.349,0.469	0.793089
chr10:43420238-43421238	RP11-517P14.2	2.01592e-06	0.00825083	CDC5L,HAND1,SNAI1,THAP1,VDR,ZBTB18	-0.078,0.026,-0.0,0.051,-0.329,0.455	0.791927
chr10:43436658-43437658	ZNF487	2.4191e-06	0.00848656	CDC5L,HAND1,SNAI1,THAP1,VDR,ZBTB18	-0.081,0.015,-0.004,0.051,-0.333,0.464	0.791564
chr10:42638068-42639068	ZNF33B	2.82229e-06	0.00866337	THAP1,VDR,ZBTB18,ZNF329,ZNF436	0.057,-0.329,0.488,0.013,-0.039	0.790997
chr10:43408666-43409666	HNRNPF	3.22547e-06	0.00880088	CDC5L,HAND1,THAP1,VDR,ZBTB18	-0.077,0.001,0.048,-0.328,0.473	0.790397
chr10:42552322-42553322	ZNF37B	3.62866e-06	0.00891089	SNAI1,THAP1,VDR,ZBTB18,ZNF329,ZNF436	-0.006,0.057,-0.329,0.489,0.008,-0.041	0.79227
chr10:43574118-43575118	ZNF239	4.03184e-06	0.0090009	CDC5L,HAND1,THAP1,VDR,ZBTB18	-0.068,0.01,0.028,-0.291,0.504	0.789806
chr10:42782301-42783301	BMS1	4.43502e-06	0.00907591	CDC5L,THAP1,VDR,ZBTB18,ZNF436	-0.025,0.045,-0.313,0.494,-0.009	0.789516
chr10:43605926-43606926	ZNF485	4.83821e-06	0.00913938	CDC5L,HAND1,THAP1,VDR,ZBTB18	-0.072,0.001,0.032,-0.296,0.507	0.790016
chr10:43605751-43606751	RP11-402L1.1	5.24139e-06	0.00919378	CDC5L,HAND1,THAP1,VDR,ZBTB18	-0.072,0.001,0.032,-0.296,0.507	0.790088
chr10:43648356-43649356	ZNF32	5.64458e-06	0.00924092	CDC5L,SNAI1,THAP1,VDR,ZBTB18	-0.064,-0.005,0.003,-0.243,0.565	0.788225
chr10:43727717-43728717	RP11-272J7.6	6.04776e-06	0.00928218	CDC5L,RARA,SNAI1,VDR,ZBTB18	-0.042,-0.174,-0.002,-0.057,0.561	0.784285
chr9:128455966-128456966	ODF2	9.27323e-06	0.0133955	E2F4,MYOD1,NR1I3,SMAD3,TGIF2,ZBTB4,ZFP64,ZNF274	0.052,0.005,-0.011,-0.079,-0.004,0.004,-0.033,0.003	0.694288
chr9:128370881-128371881	URM1	4.35439e-05	0.0594059	E2F4,ELK3,MYOD1,NR1I3,SMAD3,ZBTB4,ZFP64,ZNF274	0.053,0.002,0.007,-0.027,-0.093,0.01,-0.008,0.009	0.69395
chr15:100601740-100602740	LINS1	5.88649e-05	0.0760813	FOXC1,FOXF1,HAND1,MECP2,MTF1,ZNF394,ZSCAN31	0.014,0.045,-0.1,-0.037,-0.025,0.07,-0.008	0.698195
chr15:100602109-100603109	ASB7	6.81381e-05	0.0836634	FOXC1,FOXF1,HAND1,MECP2,MTF1,ZNF394,ZSCAN31	0.024,0.053,-0.113,-0.05,-0.038,0.085,-0.02	0.697847
chr1:16019094-16020094	HSPB7	8.58782e-05	0.100424	GFI1,JUND,OSR2,PROX1,RFX2,ZIC4,ZNF547,ZNF563	-0.015,-0.116,0.041,0.041,-0.002,0.042,-0.009,-0.028	0.693955
chr11:69704142-69705142	FGF19	9.07164e-05	0.10126	NR2F1,TCF12,MEIS3,PURA,TLX1,ZFP82,ZNF148,ZNF335	-0.014,0.047,-0.004,-0.025,-0.01,0.116,-0.018,-0.024	0.699715
chr22:49917958-49918958	ALG12	0.000127809	0.133251	CTCFL,FOXH1,IKZF1,KLF6,SREBF2,STAT4,TBX21,ZNF121	0.06,-0.011,0.014,-0.032,0.066,0.012,0.009,0.107	0.705479
chr22:50250905-50251905	HDAC10	0.000130228	0.133251	FOXH1,IKZF1,IRF2,NRF1,SREBF2,TBX21,THAP1,ZNF121	-0.012,0.011,-0.008,-0.03,0.046,0.024,0.01,0.092	0.707533
chr11:69643212-69644212	CCND1	0.000135873	0.133465	NR2F1,TCF12,PURA,SOX10,TLX1,ZFP82,ZNF148,ZNF335	-0.019,0.044,-0.029,0.003,-0.003,0.106,-0.013,-0.014	0.700367
chr11:19299502-19300502	RP11-428C19.5	0.000156839	0.148134	EHF,ELF5,MECP2,NR2F6,PRDM6,RXRG,SP3,ZNF264	-0.059,-0.007,-0.117,-0.04,0.002,-0.007,-0.017,-0.008	0.693497
chr9:128419981-128420981	CERCAM	0.000180626	0.164283	E2F4,NR1I3,SMAD3,TGIF2,ZBTB4,ZFP64,ZNF274	0.054,-0.018,-0.082,-0.01,0.008,-0.022,0.006	0.689824
chr22:50307127-50308127	PLXNB2	0.000253603	0.222419	E2F6,FOXH1,IKZF1,NRF1,SREBF2,TBX21,THAP1,ZNF121	-0.0,-0.004,0.002,-0.022,0.039,0.015,0.009,0.081	0.705079
chr9:128392214-128393214	MIR219A2	0.000286664	0.238614	E2F4,MYOD1,NR1I3,SMAD3,ZBTB4,ZFP64,ZNF274	0.051,0.006,-0.028,-0.089,0.013,-0.024,0.013	0.690234
chr22:50439253-50440253	PPP6R2	0.000291502	0.238614	E2F6,FOXH1,IKZF1,NRF1,SREBF2,TBX21,THAP1,ZNF121	-0.002,-0.007,0.006,-0.026,0.04,0.017,0.012,0.081	0.704989
chr9:128392121-128393121	MIR219B	0.00033182	0.262855	E2F4,MYOD1,NR1I3,SMAD3,ZBTB4,ZFP64,ZNF274	0.052,0.006,-0.028,-0.089,0.013,-0.023,0.013	0.690162
chr22:50326560-50327560	DENND6B	0.000347948	0.267017	E2F6,FOXH1,IKZF1,NRF1,SREBF2,TBX21,THAP1,ZNF121	-0.004,-0.009,0.006,-0.027,0.042,0.015,0.002,0.084	0.703564
chr9:128523148-128524148	GLE1	0.000400362	0.297305	DLX4,E2F4,MYOD1,NR1I3,SMAD3,ZFP64,ZNF274	-0.003,0.05,0.002,-0.004,-0.064,-0.024,0.0	0.68658
chr11:69674916-69675916	ORAOV1	0.000431004	0.297305	NR2F1,TCF12,PURA,TLX1,ZFP82,ZNF148,ZNF335	-0.014,0.045,-0.03,-0.001,0.108,-0.011,-0.016	0.69849
chr1:15847647-15848647	RP11-169K16.9	0.000433826	0.297305	GFI1,JUND,MAFK,OSR2,PROX1,RFX2,ZIC4	-0.014,-0.107,0.026,0.033,0.045,-0.028,0.039	0.685955
chr1:15876076-15877076	SPEN	0.000435842	0.297305	GFI1,JUND,MAFK,OSR2,PROX1,RFX2,ZIC4	-0.014,-0.107,0.026,0.033,0.045,-0.028,0.039	0.686022
chr22:50474524-50475524	SBF1	0.000470919	0.31255	FOXH1,IKZF1,NFIA,NRF1,SREBF2,TBX21,THAP1,ZNF121	-0.007,0.006,-0.006,-0.024,0.038,0.012,0.004,0.071	0.701716
chr16:3305229-3306229	TIGD7	0.000500755	0.31937	BCL6,CREB3L1,DMRT1,E2F7,FOSL1,POU3F4,TBP,TBX21	0.004,0.051,0.071,0.019,-0.005,-0.038,0.015,-0.013	0.689767
chr21:45336207-45337207	BX322557.13	0.000507206	0.31937	HEY2,NR2E1,POU2F1,SMAD3,RBPJ,ZFP28,ZFX,ZNF219	-0.036,0.014,0.036,0.005,0.039,-0.085,-0.022,0.021	0.686527
chr21:45375882-45376882	BX322559.2	0.000545508	0.329562	HEY2,NR2E1,POU2F1,SMAD3,RBPJ,ZFP28,ZFX,ZNF219	-0.03,0.006,0.04,0.004,0.042,-0.09,-0.028,0.026	0.688947
chr15:100715749-100716749	RP11-66B24.5	0.000555588	0.329562	FOXC1,FOXF1,HAND1,MECP2,MTF1,ZNF394	0.021,0.037,-0.101,-0.065,-0.03,0.067	0.691644
chr16:3305008-3306008	ZNF75A	0.000563651	0.329562	BCL6,CREB3L1,DMRT1,E2F7,FOSL1,POU3F4,TBP,TBX21	0.004,0.048,0.071,0.019,-0.005,-0.038,0.015,-0.013	0.689576
chr16:86300803-86301803	RP11-514D23.2	0.000591471	0.331233	CTCF,HOXB1,IRF2,MAFK,PITX3,SOX10,ZNF502	0.075,-0.002,0.051,-0.025,0.017,-0.004,-0.021	0.683716
chr17:80477343-80478343	NPTX1	0.000593487	0.331233	KLF16,NEUROD1,NKX2-5,ZNF146,PATZ1,TCF7,VAX2,ZNF320	0.039,0.01,0.045,-0.133,-0.003,0.035,-0.026,-0.033	0.691153
chr1:16003736-16004736	C1orf64	0.000632999	0.345435	GFI1,JUND,OSR2,PROX1,ZIC4,ZNF547,ZNF563	-0.013,-0.116,0.038,0.051,0.041,-0.006,-0.027	0.690077
chr16:3949944-3950944	RP11-462G12.1	0.000699121	0.373224	BACH2,BCL11A,CXXC1,DMRT1,E2F4,FOXL1,MEF2A,POU3F4	-0.024,0.005,0.012,0.063,0.03,0.056,0.04,-0.049	0.701711
chr15:100349155-100350155	RP11-168G16.1	0.000746697	0.390141	ETV2,FOXF1,FOXO6,HAND1,MECP2,MTF1,RBPJ,ZNF394	0.023,0.023,0.01,-0.045,-0.02,-0.016,-0.016,0.017	0.689252
chr21:45409565-45410565	BX322563.3	0.000777339	0.39769	HEY2,MAX,NR2E1,POU2F1,RBPJ,ZFP28,ZFX,ZNF219	-0.023,0.001,0.001,0.037,0.039,-0.088,-0.022,0.022	0.693364
chr16:3945805-3946805	RP11-462G12.2	0.000793869	0.397858	BACH2,CXXC1,DMRT1,E2F4,FOXL1,MAFK,MEF2A,POU3F4	-0.033,0.02,0.072,0.04,0.067,-0.002,0.051,-0.057	0.701082
chr22:50481224-50482224	ADM2	0.000822899	0.404158	FOXH1,IKZF1,NFIA,NRF1,SREBF2,TBX21,THAP1,ZNF121	-0.007,0.006,-0.008,-0.023,0.035,0.008,0.001,0.059	0.7
chr15:100372439-100373439	RP11-168G16.2	0.000921275	0.426803	ETV2,FOXF1,HAND1,MECP2,MTF1,RBPJ,ZNF394	0.015,0.046,-0.053,-0.026,-0.026,-0.021,0.024	0.688824
chr22:19760697-19761697	TBX1	0.000930146	0.426803	ARNT2,GBX2,PLAGL1,RFX2,ZIC4,ZNF140,ZNF219,ZNF263	0.063,-0.017,-0.088,-0.001,0.012,-0.018,-0.058,0.035	0.689676
chr16:81737748-81738748	RP11-960L18.1	0.000943451	0.426803	ELK3,HAND1,HOXD12,PATZ1,RARG,SPI1,SPIC,TBX2	-0.05,-0.019,-0.02,-0.078,0.001,0.011,0.019,0.0	0.69385
chr22:19527045-19528045	CLDN5	0.000964819	0.426803	ARNT2,DLX4,PLAGL1,RFX2,ZNF140,ZNF219,ZNF263	0.067,-0.042,-0.088,-0.006,-0.013,-0.071,0.067	0.688809
chr22:50074184-50075184	MLC1	0.000965626	0.426803	CTCFL,FOXH1,IKZF1,IRF2,SREBF2,TBX21,ZNF121,ZNF713	0.036,-0.004,0.002,-0.006,0.046,0.01,0.091,-0.003	0.699586
chr16:81797966-81798966	PLCG2	0.000973286	0.426803	ELK3,HAND1,HOXD12,PATZ1,RARG,SPI1,SPIC,TLX1	-0.031,-0.008,-0.026,-0.07,0.001,0.007,0.02,0.009	0.687976
chr22:50012159-50013159	IL17REL	0.000994655	0.428522	CTCFL,FOXH1,IKZF1,IRF2,SREBF2,TBX21,ZNF121,ZNF713	0.045,-0.01,0.009,-0.01,0.051,0.015,0.098,-0.008	0.699133
chr22:50148889-50149889	MOV10L1	0.0010253	0.434107	CTCFL,FOXH1,IKZF1,IRF2,NRF1,SREBF2,TBX21,ZNF121	0.026,-0.01,0.009,-0.016,-0.013,0.047,0.021,0.095	0.698466
chr22:50170261-50171261	PANX2	0.00108698	0.452425	CTCFL,FOXH1,IKZF1,IRF2,NRF1,SREBF2,TBX21,ZNF121	0.029,-0.01,0.009,-0.015,-0.013,0.047,0.017,0.094	0.698052
chr22:50261325-50262325	MAPK12	0.0011398	0.466502	E2F6,FOXH1,IKZF1,IRF2,NRF1,SREBF2,TBX21,ZNF121	-0.008,-0.011,0.008,-0.007,-0.02,0.048,0.018,0.09	0.697747
chr21:44477350-44478350	KB-68A7.1	0.00117609	0.473462	BCL11A,ETV1,EN1,NRF1,POU5F1,ZFP82,ZNF563	0.045,-0.04,-0.007,-0.002,0.02,-0.063,0.038	0.682968
chr22:50270267-50271267	MAPK11	0.00121116	0.479719	E2F6,FOXH1,IKZF1,IRF2,NRF1,SREBF2,TBX21,ZNF121	-0.008,-0.012,0.009,-0.005,-0.029,0.046,0.018,0.09	0.697099
chr12:123390880-123391880	KMT5A	0.00123092	0.479805	ETS2,FUBP1,GATA6,MEIS2,POU6F1,RARG,SMAD2,TGIF2	0.031,0.022,0.04,-0.017,0.011,-0.021,-0.055,-0.017	0.676084
chr22:50190098-50191098	TRABD	0.00133252	0.511293	CTCFL,FOXH1,IKZF1,IRF2,NRF1,SREBF2,TBX21,ZNF121	0.007,-0.008,0.007,-0.012,-0.022,0.046,0.021,0.092	0.697647
chr21:44510186-44511186	AP001066.10	0.00140147	0.524002	BCL11A,ETV1,EN1,NRF1,POU5F1,ZFP82,ZNF563	0.062,-0.043,-0.017,-0.002,0.02,-0.06,0.048	0.682711
chr21:44485077-44486077	AP001065.15	0.00140832	0.524002	BCL11A,ETV1,EN1,NRF1,POU5F1,ZFP82,ZNF563	0.043,-0.04,-0.007,-0.002,0.02,-0.06,0.038	0.682601
chr2:127024711-127025711	RP11-521O16.2	0.00165023	0.604239	FOXP2,KLF4,KLF9,MYBL1,NKX2-3,PGR,SOX10,ZNF232	-0.088,0.053,0.016,0.004,-0.005,0.009,-0.086,0.024	0.682954
chr11:69818524-69819524	FGF3	0.00171474	0.604239	TCF12,MEIS3,PURA,TLX1,ZFP82,ZNF148,ZNF335	0.043,-0.004,-0.034,-0.003,0.126,-0.015,-0.022	0.691687
chr15:100785689-100786689	RP11-76I7.1	0.00172361	0.604239	FOXC1,FOXD2,HAND1,MECP2,MTF1,ZNF394	0.02,0.036,-0.072,-0.08,-0.028,0.068	0.688009
chr22:49918270-49919270	CRELD2	0.00172603	0.604239	CTCFL,FOXH1,IKZF1,KLF6,SREBF2,STAT4,ZNF121	0.051,-0.003,0.006,-0.031,0.057,0.005,0.098	0.697723
chr6:44176116-44177116	CAPN11	0.001747	0.604239	BARX1,ESR1,SMARCA5,STAT1,THAP11,ZBTB4,ZNF148	0.033,-0.019,-0.021,0.043,0.039,-0.053,0.103	0.683469
chr16:86285927-86286927	RP11-514D23.1	0.00188166	0.641777	CTCF,IRF2,MAFK,PITX3,PKNOX1,SOX10,ZNF502	0.065,0.041,-0.028,0.017,-0.0,-0.004,-0.022	0.681348
chr22:49853342-49854342	ZBED4	0.00192843	0.644635	CTCFL,FOXH1,IKZF1,KLF6,SREBF2,STAT4,ZNF121	0.061,-0.007,0.01,-0.034,0.057,0.005,0.104	0.696184
chr16:86195681-86196681	RP11-805I24.2	0.00194254	0.644635	CTCF,EGR2,IRF2,MAFK,PITX3,ZNF502,ZNF554	0.064,-0.008,0.037,-0.03,0.033,-0.021,-0.016	0.680048
chr14:72516320-72517320	MIR7843	0.00201471	0.65967	ETV3,FOXP1,GLI1,HOXA11,TP73,POU5F1,SP1,ZNF350	0.023,0.0,-0.026,-0.026,0.003,0.0,0.142,0.062	0.672287
chr10:122953903-122954903	C10orf88	0.00208688	0.67431	GBX1,IRF8,NFKB2,NR1H3,NR5A2,SOX2,SOX2	-0.024,0.063,0.114,0.096,0.011,-0.014,0.005	0.686318
chr22:49962366-49963366	MIR6821	0.00219493	0.694973	CTCFL,FOXH1,IKZF1,IRF2,SREBF2,TBX21,ZNF121	0.044,-0.005,0.003,-0.005,0.05,0.007,0.094	0.698352
chr22:49960268-49961268	PIM3	0.00220743	0.694973	CTCFL,FOXH1,IKZF1,IRF2,SREBF2,TBX21,ZNF121	0.043,-0.005,0.003,-0.005,0.05,0.007,0.094	0.698323
chr2:127025223-127026223	RP11-521O16.1	0.00227396	0.704781	FOXP2,KLF4,KLF9,MYBL1,NKX2-3,PGR,SOX10,ZNF232	-0.088,0.053,0.015,0.004,-0.005,0.009,-0.085,0.024	0.683164
chr11:69774903-69775903	FGF4	0.00232274	0.704781	TCF12,NFIA,PURA,TLX1,ZFP82,ZNF148,ZNF281,ZNF335	0.044,0.0,-0.0,-0.002,0.12,-0.023,-0.002,-0.023	0.694379
chr17:78902717-78903717	CEP295NL	0.00234452	0.704781	HAND1,IRF3,OSR2,ZNF146,SMAD4,VAX2,ZNF768	0.021,0.069,-0.067,-0.098,-0.034,-0.023,-0.005	0.690391
chr21:45477766-45478766	MIR6815	0.00235339	0.704781	IRF8,MAX,POU2F1,RBPJ,ZFP28,ZFX,ZNF219	0.014,0.005,0.037,0.038,-0.084,-0.017,0.022	0.693593
chr10:123008516-123009516	ACADSB	0.00240056	0.710247	GBX1,IRF8,NFKB2,NR1H3,NR5A2,SOX2,SOX2	-0.024,0.06,0.113,0.1,0.011,-0.001,0.01	0.686303
chr6:44126957-44127957	MRPL14	0.00246265	0.719943	BARX1,ESR1,HOXB13,SOX8,STAT1,THAP11,ZBTB4,ZNF148	0.03,-0.016,0.004,-0.004,0.04,0.05,-0.056,0.094	0.681668
chr16:81618005-81619005	RP11-274A11.3	0.00250055	0.72086	ELK3,HAND1,PATZ1,RARG,SPI1,SPIC,TLX1,ZNF354A	-0.042,-0.028,-0.079,0.004,0.013,0.005,0.008,0.012	0.686561
chr11:134026487-134027487	RP11-713P17.5	0.00257272	0.72086	TFAP2C,FEZF1,FIGLA,KLF15,THAP11,ZNF335,ZNF768	0.009,0.054,-0.008,0.047,-0.026,0.034,-0.016	0.675455
chr16:81629693-81630693	RP11-274A11.4	0.00257635	0.72086	ELK3,HAND1,HOXD12,PATZ1,RARG,SPI1,SPIC,TLX1	-0.043,-0.03,-0.006,-0.079,0.004,0.015,0.002,0.008	0.685622
chr22:50314131-50315131	XX-C283C717.1	0.0025832	0.72086	E2F6,FOXH1,IKZF1,NFIA,NRF1,SREBF2,TBX21,ZNF121	-0.005,-0.01,0.007,-0.001,-0.028,0.043,0.016,0.085	0.69557
chr16:4670818-4671818	MIR6769A	0.0026719	0.730366	DMRT1,MESP1,POU4F3,RARG,TBP,ZNF263	0.013,0.008,-0.005,-0.005,0.032,-0.145	0.674059
chr15:41774202-41775202	MAPKBP1	0.00277874	0.730366	ESR2,FOSL2,FOXG1,LEF1,SNAI1,ZIC3,ZNF257	0.071,-0.031,0.112,-0.001,-0.026,0.007,-0.012	0.68001
chr22:49827012-49828012	BRD1	0.00278923	0.730366	CTCFL,FOXH1,IKZF1,KLF6,SREBF2,STAT4,ZNF121	0.052,-0.005,0.004,-0.016,0.055,0.001,0.102	0.69506
chr17:78902763-78903763	CTD-2373H9.5	0.00279447	0.730366	HAND1,IRF3,OSR2,ZNF146,SMAD4,VAX2,ZNF768	0.021,0.068,-0.067,-0.099,-0.034,-0.023,-0.017	0.690601
chr22:50486376-50487376	MIOX	0.00283721	0.730366	FOXH1,IKZF1,IRF8,NFIA,NRF1,SREBF2,TBX21,ZNF121	-0.006,0.006,-0.001,-0.008,-0.023,0.037,0.007,0.059	0.695231
chr22:19479438-19480438	CDC45	0.00293195	0.730366	ARNT2,GBX2,PLAGL1,ZNF140,ZNF219,ZNF263,ZNF341	0.059,-0.014,-0.076,-0.003,-0.061,0.049,0.006	0.683864
chr6:44265288-44266288	NFKBIE	0.00296743	0.730366	BARX1,ESR1,SMARCA5,STAT1,THAP11,ZBTB4,ZNF148	0.027,-0.008,-0.026,0.039,0.024,-0.012,0.094	0.682254
chr16:2857398-2858398	LA16c-325D7.1	0.00300735	0.730366	FOSL1,GSC,OLIG2,POU2F1,PRDM6,TBX21,ZNF490,ZNF770	-0.017,-0.027,-0.007,-0.006,0.003,-0.019,-0.013,-0.032	0.678028
chr6:44257071-44258071	SLC35B2	0.00302106	0.730366	BARX1,ESR1,SMARCA5,STAT1,THAP11,ZBTB4,ZNF148	0.027,-0.014,-0.026,0.039,0.029,-0.02,0.091	0.682192
chr21:45541971-45542971	SLC19A1	0.00302227	0.730366	HEY2,IRF8,MAX,RBPJ,ZFP28,ZFX,ZNF219	-0.001,0.02,0.011,0.036,-0.084,-0.036,0.03	0.696375
chr22:19478715-19479715	UFD1L	0.00302832	0.730366	ARNT2,GBX2,PLAGL1,ZNF140,ZNF219,ZNF263,ZNF341	0.057,-0.012,-0.074,-0.001,-0.058,0.046,0.005	0.683878
chr22:50507191-50508191	LMF2	0.00304646	0.730366	FOXH1,IKZF1,IRF8,NFIA,NRF1,SREBF2,TBX21,ZNF121	-0.011,0.011,-0.007,-0.012,-0.027,0.041,0.01,0.064	0.695036
chr11:134036609-134037609	RP11-713P17.3	0.00304686	0.730366	TFAP2C,FEZF1,FIGLA,KLF15,THAP11,ZNF335,ZNF768	0.001,0.049,-0.007,0.048,-0.025,0.028,-0.017	0.675169
chr11:134036607-134037607	RP11-713P17.4	0.00304726	0.730366	TFAP2C,FEZF1,FIGLA,KLF15,THAP11,ZNF335,ZNF768	0.001,0.049,-0.007,0.048,-0.025,0.028,-0.017	0.675169
chr22:50507760-50508760	NCAPH2	0.00306339	0.730366	FOXH1,IKZF1,IRF8,NFIA,NRF1,SREBF2,TBX21,ZNF121	-0.011,0.011,-0.007,-0.012,-0.028,0.041,0.01,0.064	0.694688
chr11:65088875-65089875	TMEM262	0.00327869	0.774181	KLF14,KLF16,LMX1A,NFIA,RFX5,WT1,ZNF264,ZNF329	0.0,0.031,-0.047,-0.005,0.001,-0.048,-0.076,-0.035	0.685279
chr11:133956485-133957485	IGSF9B	0.00334522	0.778255	FEZF1,FIGLA,KLF15,PRDM4,THAP11,ZNF354A,ZNF335,ZNF768	0.051,-0.012,0.057,-0.001,-0.022,0.003,0.04,-0.021	0.673197
chr10:123008317-123009317	IKZF5	0.00335933	0.778255	GBX1,IRF8,NFKB2,NR1H3,NR5A2,SOX2,SOX2	-0.024,0.06,0.113,0.1,0.011,-0.001,0.01	0.686232
chr16:3500518-3501518	CLUAP1	0.00350286	0.788418	DMRT1,E2F7,FOSL1,GSC,MYOG,POU3F4,SRY	0.075,0.02,-0.001,-0.01,0.009,-0.055,0.035	0.687566
chr10:117005077-117006077	SHTN1	0.00352988	0.788418	ARNTL,IRX2,ZNF146,PRDM4,TFCP2,ZBTB4,ZIC3,ZNF264	0.065,-0.009,-0.065,0.034,0.003,0.01,-0.025,0.015	0.6708
chr14:77457452-77458452	VIPAS39	0.00358511	0.788418	FLI1,ID4,MYOD1,RARA,THRB,THRB,VDR	0.068,-0.009,0.019,-0.006,-0.02,-0.033,-0.02	0.684431
chr16:86349183-86350183	RP11-158I3.2	0.00360567	0.788418	CTCF,HOXB1,LMX1A,MAFK,PITX3,SOX10,ZNF502	0.07,-0.003,0.007,-0.021,0.01,-0.004,-0.019	0.678685
chr22:35647895-35648895	APOL6	0.00361616	0.788418	AR,BARX1,HOXC8,NR3C2,TFAP4,UBP1,ZKSCAN1,ZNF320	-0.05,-0.027,0.075,-0.008,-0.087,-0.012,0.007,0.025	0.676703
chr22:19666523-19667523	AC000067.1	0.00364317	0.788418	ARNT2,GBX2,PLAGL1,ZNF140,ZNF219,ZNF263	0.055,-0.01,-0.077,-0.003,-0.058,0.062	0.68425
chr20:1392538-1393538	FKBP1A	0.00366736	0.788418	NR2F2,GLI2,INSM1,PATZ1,ZNF354A,ZFX,ZNF563	-0.052,-0.012,0.006,0.004,-0.058,0.065,-0.004	0.673492
chr8:22877642-22878642	RP11-87E22.2	0.00371332	0.788418	EGR2,FOXD1,GLI2,HMX1,HOXB8,SP1,ZNF350	-0.123,-0.004,0.013,0.011,0.007,0.022,-0.002	0.683793
chr16:4640123-4641123	RP11-709D24.6	0.0037484	0.788418	DMRT1,MESP1,POU3F3,RARG,TBP,ZNF263	0.016,0.016,-0.023,-0.008,0.035,-0.147	0.672644
chr10:132942323-132943323	CFAP46	0.00379477	0.788418	BCL6,ESR2,FOXM1,MAF,NR1H3,TFAP4,ZNF134	-0.034,-0.051,-0.024,0.064,-0.001,0.093,-0.008	0.687447
chr1:228632249-228633249	RNA5S11	0.0037988	0.788418	BHLHE41,CEBPB,CLOCK,ETV4,NFIC,SNAI1,SOX11,ZNF554,ZSCAN16	0.027,-0.013,-0.03,0.004,-0.019,0.004,0.036,-0.025,-0.003	0.683802
chr11:134139140-134140140	JAM3	0.00380525	0.788418	TFAP2C,FEZF1,FIGLA,KLF15,THAP11,ZNF335,ZNF768	0.004,0.046,-0.001,0.031,-0.02,0.025,-0.012	0.673835
chr2:73736900-73737900	TPRKB	0.00382057	0.788418	FOXQ1,GLIS2,NR1I3,RUNX2,SALL4,ZBTB7A,ZNF382	0.019,0.031,0.014,-0.046,0.006,0.023,0.028	0.679252
chr22:19717958-19718958	SEPT5	0.00390847	0.799835	ARNT2,GBX2,PLAGL1,ZNF140,ZNF219,ZNF263	0.06,-0.015,-0.085,-0.014,-0.061,0.054	0.684188
chr22:19291216-19292216	CLTCL1	0.00408304	0.821009	ARNT2,E2F6,LMX1A,MAFF,PLAGL1,ZNF219	0.075,0.059,-0.048,0.024,-0.092,-0.001	0.686661
chr6:163324030-163325030	PACRG-AS1	0.00413062	0.821009	HMGA1,IRF8,MAFF,NANOG,PTF1A,ZNF260,ZNF329	-0.078,-0.027,-0.047,-0.023,0.011,0.031,-0.015	0.673659
chr16:4115685-4116685	ADCY9	0.00417416	0.821009	CXXC1,DMRT1,E2F4,FOXL1,MAFK,MEF2D,POU3F4	0.029,0.059,0.002,0.044,-0.007,0.044,-0.034	0.695069
chr12:131795618-131796618	SFSWAP	0.0042036	0.821009	AHR,HAND1,MECP2,PRDM6,RARG,TBX15,TCF7L1,ZNF586	-0.017,-0.012,-0.036,0.032,0.031,-0.045,-0.014,0.064	0.680924
chr22:19717969-19718969	SEPT5-GP1BB	0.00422779	0.821009	ARNT2,GBX2,PLAGL1,ZNF140,ZNF219,ZNF263	0.06,-0.015,-0.085,-0.012,-0.06,0.054	0.683635
chr10:133229774-133230774	UTF1	0.00427859	0.821009	BCL6,ESR2,FOXM1,MAFK,MAF,NKX6-1,TFAP4	-0.027,-0.055,-0.018,0.014,0.021,-0.071,0.015	0.684445
chr10:133236904-133237904	VENTX	0.00427899	0.821009	BCL6,ESR2,FOXM1,MAFK,MAF,NKX6-1,TFAP4	-0.028,-0.055,-0.018,0.014,0.021,-0.071,0.015	0.684445
chr11:20027054-20028054	NAV2	0.0042794	0.821009	MECP2,NEUROD1,NFATC1,NR2F6,POU3F3,RUNX2,RXRG,ZNF263	-0.064,-0.007,0.022,-0.066,-0.02,-0.025,-0.017,-0.006	0.690834
chr14:72539562-72540562	RGS6	0.00435277	0.828613	ETV3,FOXP1,GLI2,KLF1,NR1D1,TP73,POU5F1,ZNF350	0.027,0.006,-0.046,0.107,0.005,0.015,0.036,0.068	0.671982
chr1:7941872-7942872	RP5-892F13.2	0.00438664	0.828637	BHLHE23,EN1,NR1H4,PRDM1,PGR,TAF1,TBX1	-0.006,0.025,-0.021,-0.004,-0.022,-0.018,0.081	0.68343
chr14:65102195-65103195	MAX	0.00463258	0.863247	BHLHA15,FIGLA,FLI1,HAND1,HBP1,LMX1A,TP63,POU4F1	0.007,-0.025,0.009,0.064,-0.027,0.064,0.005,-0.001	0.679119
chr12:123533218-123534218	RILPL1	0.00466605	0.863247	CLOCK,ETS2,HESX1,KLF16,LMX1B,POU5F1,POU6F1,SMAD2	0.006,0.027,-0.019,-0.012,-0.017,-0.019,0.001,-0.048	0.670262
chr1:15975632-15976632	ZBTB17	0.00467532	0.863247	JUND,OSR2,PROX1,RFX2,ZIC4,ZNF563	-0.106,0.026,0.043,-0.001,0.031,-0.014	0.684021
chr16:85583071-85584071	RP11-118F19.1	0.00478217	0.872299	ATF1,EGR2,HNF1B,MAFK,PITX3,SOX10,ZNF354A,ZNF214	0.032,-0.016,0.022,-0.018,0.03,-0.007,0.02,0.023	0.689367
chr17:77958740-77959740	TNRC6C	0.00480878	0.872299	T,FUBP1,HLTF,HSF2,NR2C1,RREB1,SREBF2,ZNF121,ZNF449	-0.008,-0.021,-0.009,0.008,-0.063,0.001,0.002,-0.006,-0.05	0.677818
chr5:150289791-150290791	CAMK2A	0.00486482	0.872299	ETV5,GFI1,MEIS3,TP53,RREB1,SOX10,TBX2,ZNF784	-0.034,0.024,0.004,-0.007,0.024,-0.006,0.014,0.045	0.684874
chr16:4663569-4664569	MGRN1	0.00486643	0.872299	DMRT1,MESP1,POU3F3,RARG,TBP,ZNF263	0.059,0.015,-0.024,-0.01,0.036,-0.148	0.671806
chr10:133247120-133248120	MIR202	0.00490917	0.873583	BCL6,ESR2,FOXJ2,MAFK,MAF,NKX6-1,TFAP4	-0.028,-0.056,-0.018,0.015,0.021,-0.051,0.033	0.684593
chr15:67548498-67549498	MAP2K5	0.00496521	0.877199	E2F6,FOXJ3,IRF8,OLIG3,POU1F1,THAP11,THRB,ZFP28	0.0,0.015,-0.009,0.035,0.034,-0.013,0.001,-0.014	0.696661
